# Supplementary material for: Regulatory protein SrpA controls phage infection and core cellular processes in Pseudomonas aeruginosa
Source: PubMed Central journal article supplement (PMC5945682; doi:10.1038/s41467-018-04232-6), 2018-05-10
Supplement: 41467_2018_4232_MOESM1_ESM.pdf [file 41467_2018_4232_MOESM1_ESM.pdf]

**Regulatory protein SrpA controls phage infection and core cellular processes in**

*Pseudomonas aeruginosa*

**You et al**

### Supplementary Figure 1

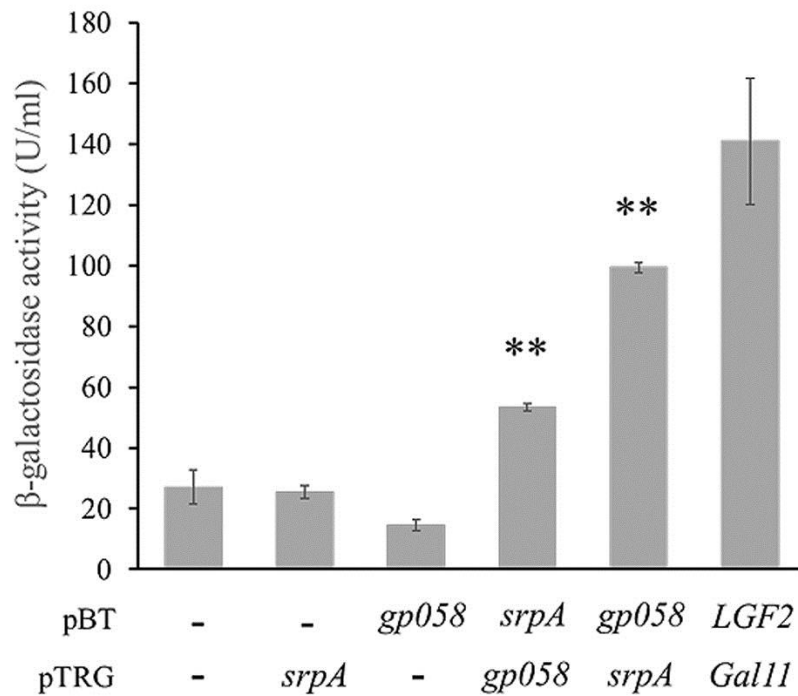

**Supplementary Figure 1.** Bacterial two-hybrid analysis. Negative controls: pBT+pTRG, pBT +pTRG-*srpA*, and pBT-*gp058*+pTRG. \*\*: P<0.01, all three negative controls show significant differences from the test groups of pBT-*srpA* +pTRG-*gp058* and pBT-*gp058*+pTRG-*srpA*, respectively. Positive control: pBT-*LGF2* +pTRG-*Gal11*. The experiments were independently replicated three times. One-way ANOVA was used to examine the mean differences between the data groups. \*\*: P<0.01. Error bars show standard deviations.

## Supplementary Figure 2

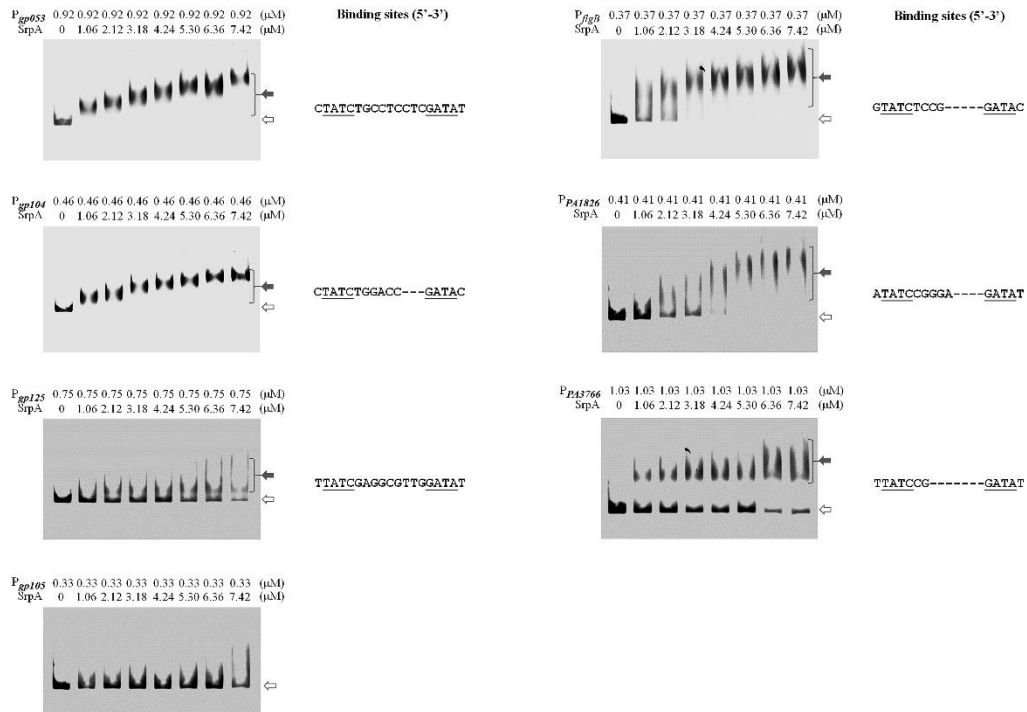

**Supplementary Figure 2.** Verification of the SrpA binding sites. Left panel: gel-shifting assay of the promoter regions of three phage K5 genes. Right panel: gel-shifting assay of the promoter regions of three bacterial genes. The *gp105* promoter without a SrpA binding site was used as a negative control. Grey arrows represent DNA fragments bound with the SrpA protein. Blank arrows represent free DNA fragments. The palindromic sequences of each binding site were underlined.

### Supplementary Figure 3

a

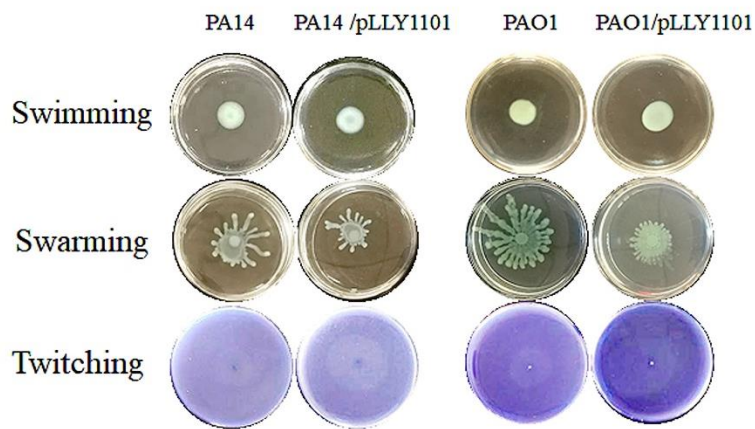

b

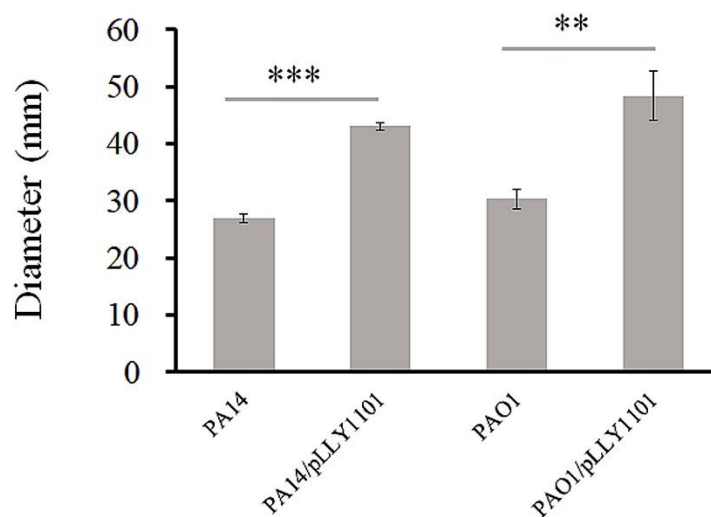

### Supplementary Figure 3. Effects of SrpA on cell motility in PAO1 and PA14. (a)

The upper panel represents swimming assay. The mid-panel represents swarming assay. The lower panel and (b) represents twitching motility assay. SrpA was overexpressed in the strains PAO1 and PA14 (Supplementary Table 2). The plasmid pLLY1101 carries the *srpA* gene. The experiments were independently replicated three times. One-way ANOVA was used to examine the mean differences between the data groups. \*\*:  $P < 0.01$ . \*\*\*:  $P < 0.001$ . Error bars show standard deviations.

#### Supplementary Figure 4

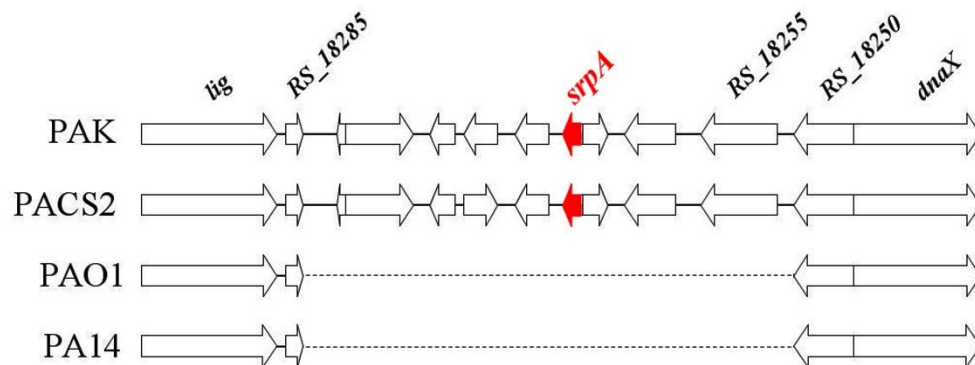

**Supplementary Figure 4.** The genomic context of the *srpA* gene. Both PAK and PACS2 have a 7.2 kb fragment carrying the *srpA* gene inserted between two genetic loci *dnaX* and *lig*. *dnaX*: encoding a putative DNA polymerase subunits gamma/tau. *lig*: encoding a putative DNA ligase. *Y880\_RS18250*: encoding a putative amino acid ABC transporter substrate-binding protein. *Y880\_RS18255*: encoding a putative integrase. The remaining CDSs encode hypothetical proteins.

## Supplementary Figure 5

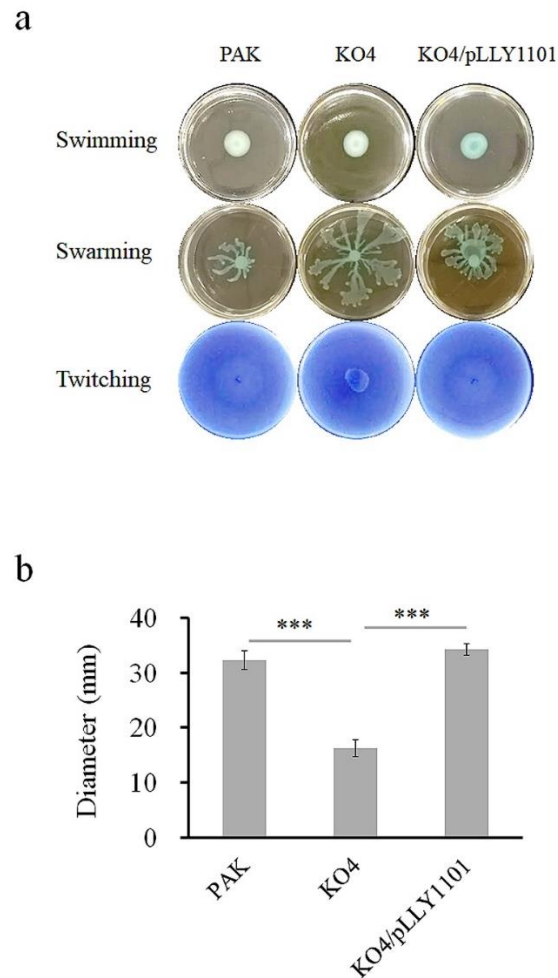

**Supplementary Figure 5.** Cell motility assay of the *srpA* gene deletion mutant. (a) The upper panel represents swimming assay. The mid-panel represents swarming assay. The lower panel and (b) represents twitching motility assay. KO4 was the *srpA* gene deletion mutant in PAK (Supplementary Table 2). The plasmid pLLY1101 carries the *srpA* gene. The experiments were independently replicated three times. One-way ANOVA was used to examine the mean differences between the data groups. \*\*\*:  $P < 0.001$ . Error bars show standard deviations.

## Supplementary Figure 6

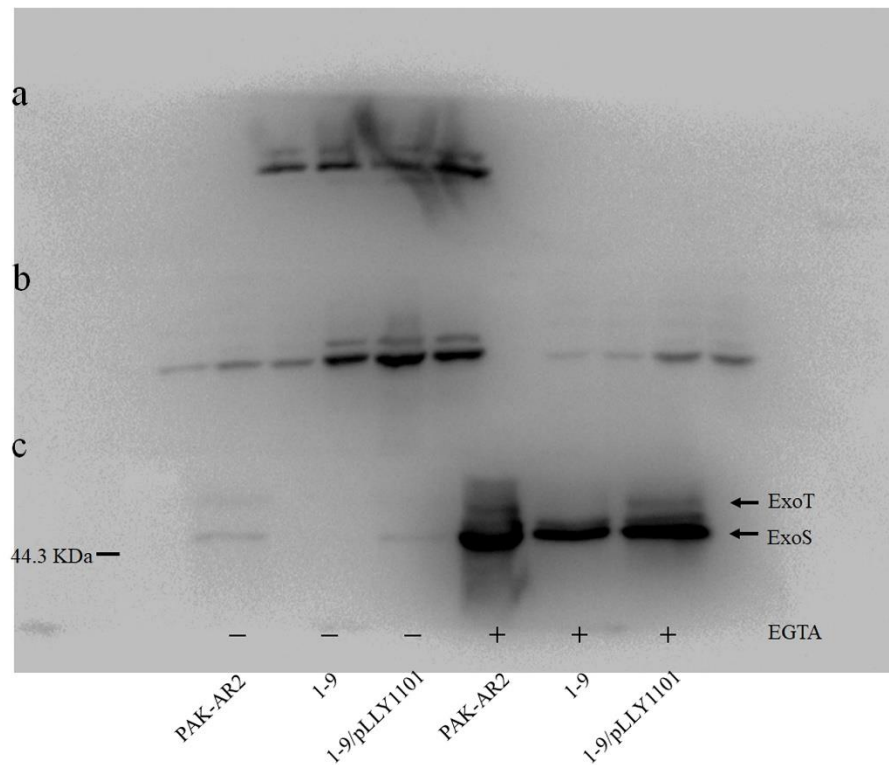

Supplementary Figure 6. The full blots of the detection of secreted ExoS and ExoT in bacterial culture supernatants by Western blot. The upper panel (a) and the middle panel (b) represent the experiments not related with our test, and the lower panel (c) represents the original image for our Western blot analysis\*. 1-9: a *srpA* derivative of PAK-AR2. pLLY1101: a plasmid carrying the *srpA* gene (Supplementary table 2). Protein Molecular Weight Marker (Low) is used in the SDS-PAGE analysis, and it is from TAKARA BIOTECHNOLOGY (DALIAN) CO., LTD. (Code No. 3450).

\*Three membranes from three different experiments were put together and exposed to the same piece of X-ray film simultaneously.

**Supplementary Table 1. SrpA DNA binding sites upstream of bacteria or phage genes**

| Gene ID | Gene name    | Start (bp) | End (bp) | log2 ratio (1-9A/PAK-AR2) | Binding sequence (5'-3') | Function                                                    |
|---------|--------------|------------|----------|---------------------------|--------------------------|-------------------------------------------------------------|
| PA1077  | <i>flgB</i>  | 1164061    | 1164073  | 1.3261                    | ATATCGACGATAT            | flagellar basal-body rod protein FlgB                       |
| PA3115  | <i>fimV</i>  | 3498367    | 3498383  | 0.3672                    | CTATCTGTAAAAGATAC        | type IV pilus                                               |
| PA2522  | <i>czcC</i>  | 2843385    | 2843402  | 0.0202                    | ATATCGCCGGCGAGATAT       | outer membrane protein precursor CzcC                       |
| PA3397  | <i>fprA</i>  | 3803456    | 3803474  | 0.4781                    | ATATCCATATTCTGGATAA      | cofactor biosynthetic process                               |
| PA4086  | <i>cupB1</i> | 4570040    | 4570051  | 0.1559                    | GTATCCCGATAT             | probable fimbrial subunit CupB1                             |
| PA2760  | <i>oprQ</i>  | 3119794    | 3119812  | 0.2843                    | TTATCGATAAGGTTGATAT      | transport                                                   |
| PA0688  | <i>lapA</i>  | 747052     | 747065   | 0.4781                    | GTATCGGCGGATAA           | low-molecular-weight alkaline phosphatase A, LapA           |
| PA2523  | <i>czcR</i>  | 2843385    | 2843402  | 0.4294                    | ATATCTCGCCGGCGATAT       | Two-component system                                        |
| PA0873  | <i>phhR</i>  | 953460     | 953469   | 0.3633                    | TTATCGATAC               | transcriptional regulator PhhR                              |
| PA3763  | <i>purL</i>  | 4219653    | 4219667  | 0.3078                    | CTATCGCCGGGATAC          | phosphoribosylformylglycinamide synthase                    |
| PA2512  | <i>antA</i>  | 2829231    | 2829242  | 0.4075                    | CTATCCGGATAG             | anthranilate dioxygenase large subunit                      |
| PA2511  | <i>antR</i>  | 2829231    | 2829242  | 0.0805                    | CTATCCGGATAG             | regulation of transcription                                 |
| PA4277  | <i>tufb</i>  | 4785575    | 4785592  | -0.3597                   | TTATCCAGGGCAGATAT        | Translation elongation factor                               |
| PA1898  | <i>qscR</i>  | 2069014    | 2069031  | -0.4053                   | GTATCTGCGGAGAGATAG       | quorum-sensing control repressor                            |
| PA1249  | <i>apra</i>  | 1355573    | 1355587  | -0.3333                   | TTATCCATCCGATAA          | alkaline metalloproteinase precursor                        |
| PA4857  | <i>tspR</i>  | 5455097    | 5455110  | -0.0577                   | GTATCGGCGGATAA           | protein secretion by the type III secretion system          |
| PA5206  | <i>argE</i>  | 5861656    | 5861674  | -0.0189                   | TTATCCACTGCCGCGATAG      | acetylornithine deacetylase                                 |
| PA2493  | <i>mexE</i>  | 2808639    | 2808657  | -0.6738                   | GTATCACTGTTTCGTGATAA     | RND multidrug efflux membrane fusion protein MexE precursor |
| PA1727  | <i>mucR</i>  | 1870802    | 1870816  | -0.6088                   | ATATCAGGTTGATAT          | Biofilm formation                                           |
| PA3540  | <i>algD</i>  | 3962465    | 3962474  | -0.5002                   | CTATCGATAG               | GDP-mannose 6-dehydrogenase AlgD                            |
| PA4581  | <i>rtcR</i>  | 5130775    | 5130790  | -0.7211                   | TTATCTTGAAGGATAA         | transcriptional regulator RtcR                              |
| PA4267  | <i>rpsG</i>  | 4771726    | 4771741  | -0.7338                   | TTATCTGAGTCGATAA         | 30S ribosomal protein S7                                    |
| PA4268  | <i>rpsL</i>  | 4772247    | 4772258  | -0.6371                   | CTATCCCGATAG             | 30S ribosomal protein S12                                   |
| PA0293  | <i>aguB</i>  | 330981     | 330991   | -0.5280                   | ATATCCGATAA              | N-carbamoylputrescine amidohydrolase                        |
| PA3745  | <i>rpsP</i>  | 4306340    | 4306351  | -1.1256                   | ATATCGAGATAA             | 30S ribosomal protein S16                                   |
| PA0942  |              | 1030680    | 1030694  | 0.6289                    | GTATCGATACGATAC          | probable transcriptional regulator                          |
| PA1826  |              | 1985940    | 1985954  | 1.2293                    | ATATCCGGGAGATAT          | probable transcriptional regulator                          |
| PA2121  |              | 2333892    | 2333910  | 1.3992                    | TTATCAGGGTAATGGATAA      | probable transcriptional regulator                          |
| PA0233  |              | 262426     | 262439   | 0.2591                    | TTATCCGCGGATAC           | probable transcriptional regulator                          |
| PA3398  |              | 3803456    | 3803474  | 0.4352                    | TTATCCAGAATATGGATAT      | probable transcriptional regulator                          |
| PA0179  |              | 204644     | 204653   | -0.3672                   | GTATCGATAG               | probable two-component response regulator                   |
| PA4070  |              | 4548861    | 4548870  | -0.3667                   | ATATCGATAA               | probable transcriptional regulator                          |
| PA4989  |              | 5606022    | 5606040  | -0.4570                   | CTATCTTTATTGGAGATAG      | probable transcriptional regulator                          |
| PA5157  |              | 5804947    | 5804958  | -0.9291                   | ATATCTTGATAA             | probable transcriptional regulator                          |



|                              |              |         |         |         |                     |                                                   |
|------------------------------|--------------|---------|---------|---------|---------------------|---------------------------------------------------|
| <i>PA0985</i>                | <i>pyos5</i> | 1068020 | 1068032 | -       | TTATCAGAGATAC       | pyocin S5                                         |
| <i>PA1094</i>                | <i>fliD</i>  | 1185009 | 1185023 | -       | CTATCGAAGGGATAG     | flagellar capping protein FliD                    |
| <i>PA1366</i>                |              | 1479909 | 1479922 | -       | GTATCTCTCGATAG      | hypothetical protein                              |
| <i>PA0015</i>                |              | 17339   | 17357   | 0.3254  | CTATCGCGAACGGCGATAG | hypothetical protein                              |
| <i>PA0042</i>                |              | 54636   | 54648   | 0.1219  | ATATCGGGCGATAC      | hypothetical protein                              |
| <i>PA0136</i>                |              | 154009  | 154023  | -0.4878 | ATATCTTGTGGATAA     | probable ATP-binding component of ABC transporter |
| <i>PA0941</i>                |              | 1030680 | 1030694 | 0.4193  | GTATCGTATCGATAC     | hypothetical protein                              |
| <i>PA0986</i>                |              | 1068020 | 1068032 | -0.5108 | GTATCTCTGATAA       | conserved hypothetical protein                    |
| <i>PA1227</i>                |              | 1329176 | 1329192 | -0.5029 | ATATCGCCGGGCGATAG   | hypothetical protein                              |
| <i>PA1362</i>                |              | 1474154 | 1474168 | 0.6206  | TTATCCGCCGGATAC     | hypothetical protein                              |
| <i>PA1415</i>                |              | 1539728 | 1539744 | -0.9615 | CTATCCCAGAAGGATAG   | hypothetical protein                              |
| <i>PA1728</i>                |              | 1870802 | 1870816 | -0.0949 | ATATCAACCTGATAT     | hypothetical protein                              |
| <i>PA1827</i>                |              | 1985940 | 1985954 | 0.8780  | ATATCTCCCGGATAT     | probable short-chain dehydrogenase                |
| <i>PA1874</i>                |              | 2036251 | 2036265 | 0.5110  | TTATCAATTAGATAG     | hypothetical protein                              |
| <i>PA1873</i>                |              | 2036251 | 2036265 | -0.0298 | CTATCTAATTGATAA     | hypothetical protein                              |
| <i>PA1897</i>                |              | 2069014 | 2069031 | 0.5559  | CTATCTCTCCGCAGATAC  | hypothetical protein                              |
| <i>PA2122</i>                |              | 2333892 | 2333910 | 0.2662  | TTATCCATTACCCTGATAA | hypothetical protein                              |
| <i>PA2422</i>                |              | 2705500 | 2705513 | 0.6882  | GTATCGGCGGATAC      | hypothetical protein                              |
| <i>PA2573</i>                |              | 2910642 | 2910657 | 0.7803  | CTATCCTTAGCGATAT    | probable chemotaxis transducer                    |
| <i>PA2759</i>                |              | 3119794 | 3119812 | 1.9617  | ATATCAACCTTATCGATAA | hypothetical protein                              |
| <i>PA2784</i>                |              | 3141627 | 3141643 | 0.4252  | TTATCGTTTTACGATAA   | hypothetical protein                              |
| <i>PA2868</i>                |              | 3221098 | 3221112 | 0.2626  | CTATCGCCCGGATAG     | hypothetical protein                              |
| <i>PA3520</i>                |              | 3937875 | 3937884 | -1.2753 | TTATCGATAA          | hypothetical protein                              |
| <i>PA3764</i>                |              | 4219653 | 4219667 | -0.0716 | GTATCCCGGCGATAG     | hypothetical protein                              |
| <i>PA3765</i>                |              | 4221857 | 4221868 | -0.3356 | TTATCCGGATAA        | hypothetical protein                              |
| <i>PA3766</i>                |              | 4223466 | 4223477 | -1.0299 | TTATCCGGATAT        | probable aromatic amino acid transporter          |
| <i>PA3844</i>                |              | 4306340 | 4306351 | 0.2028  | TTATCTCGATAT        | hypothetical protein                              |
| <i>PA4087</i>                |              | 4570040 | 4570051 | 1.3922  | ATATCGGGATAC        | hypothetical protein                              |
| <i>PA4990</i>                |              | 5606022 | 5606040 | -0.0456 | CTATCTCCAATAAAGATAG | SMR multidrug efflux transporter                  |
| <i>PA5567</i>                |              | 6261762 | 6261775 | -0.3929 | CTATCCGGAGATAT      | conserved hypothetical protein                    |
| <i>PA3230</i>                |              | 3618607 | 3618620 | 0.1385  | GTATCGGCGGATAA      | conserved hypothetical protein                    |
| <i>PA3284</i>                |              | 3677316 | 3677332 | 0.0873  | ATATCGCTGCGGATAT    | hypothetical protein                              |
| <i>gp001</i> or <i>gp002</i> |              | 303     | 312     | -       | CTATCGATAG          | hypothetical proteins                             |
| <i>gp055</i>                 |              | 28376   | 28385   | -       | TTATCGATAA          | hypothetical protein                              |
| <i>gp074</i>                 |              | 42415   | 42424   | -       | CTATCGATAC          | hypothetical protein                              |
| <i>gp177</i> or <i>gp178</i> |              | 92875   | 92884   | -       | CTATCGATAG          | hypothetical proteins                             |
| <i>gp166</i>                 |              | 87558   | 87568   | -       | GTATCTGATAA         | hypothetical protein                              |
| <i>gp015</i>                 |              | 7268    | 7279    | -       | TTATCCTGATAA        | hypothetical protein                              |
| <i>gp140</i>                 |              | 77814   | 77827   | -       | CTATCCCTCGATAA      | hypothetical protein                              |

|              |       |       |   |                     |                       |
|--------------|-------|-------|---|---------------------|-----------------------|
| <i>gp131</i> | 75323 | 75337 | - | CTATCTTATAGATAA     | hypothetical protein  |
| <i>gp147</i> | 81598 | 81612 | - | GTATCCGTCTGATAT     | hypothetical protein  |
| <i>gp009</i> | 5037  | 5052  | - | GTATCCAGAGAGATAA    | hypothetical protein  |
| <i>gp074</i> | 42613 | 42628 | - | TTATCGAAAACGATAC    | hypothetical protein  |
| <i>gp104</i> | 58950 | 58965 | - | CTATCTGGACCGATAC    | DNA polymerase I      |
| <i>gp053</i> | 27055 | 27073 | - | CTATCTGCCTCCTCGATAT | DNA methyltransferase |
| <i>gp058</i> | 31024 | 31042 | - | GTATCTCCAAATCGGATAT | RNA polymerase        |
| <i>gp125</i> | 70698 | 70716 | - | TTATCTCCAAATCGGATAT | hypothetical protein  |

a: No expression data is available for PA0985, PA1094, and PA1366 in the transcriptome analysis.

b: Annotation is performed using strain PAO1 as the reference.

c: Phage genes are named with prefix '*gp*'.

d: The SrpA binding sites are located at the upstream regions between two divergent genes pairs, *gp001* and *gp002* and *gp177* and *gp178*, respectively.

e: Two SrpA binding sites are found located at the upstream region of the *gp074* gene.

f: No expression test is performed for phage genes in the transcriptome analysis.

**Supplementary Table 2. Bacterial strains and plasmids used in this study**

| Strain/ Plasmid<br>/Phage/Nematode     | Description                                                                                     | Source<br>(Reference) |
|----------------------------------------|-------------------------------------------------------------------------------------------------|-----------------------|
| <i>P. aeruginosa</i>                   |                                                                                                 |                       |
| PAK                                    | Wild type <i>Pseudomonas aeruginosa</i> strain                                                  | 1                     |
| PAK-AR2                                | PAK deleted of the <i>purEK</i> gene, Sp <sup>r</sup> Sm <sup>r</sup>                           | 2                     |
| 1-9                                    | PAK-AR2 with Tn5G transposon inserted at <i>sprA</i> , Gm <sup>r</sup>                          | This study            |
| C11-1                                  | PAK with Tn5G transposon inserted at <i>sprA</i> , Gm <sup>r</sup>                              | 3                     |
| KO4                                    | PAK with <i>sprA</i> gene deletion                                                              | This study            |
| PAO1                                   | Wild type <i>P. aeruginosa</i> strain                                                           | 4                     |
| PA14                                   | Wild type <i>P. aeruginosa</i> strain                                                           | 5                     |
| <i>E. coli</i>                         |                                                                                                 |                       |
| DH5α                                   | <i>hsdR recA lacZYAF80 lacZDM15</i>                                                             | BRL                   |
| OP50                                   | Uracil auxotroph                                                                                | 6                     |
| RS                                     | BacterioMatch two-hybrid system reporter strain, Km <sup>r</sup>                                | Stratagene            |
| M15                                    | Overexpression of <i>lacI</i> , Km <sup>r</sup>                                                 | Qiagen                |
| <b>Plasmid</b>                         |                                                                                                 |                       |
| pEx18Gm                                | Gene replacement vector, Gm <sup>r</sup> <i>oriT</i> <sup>+</sup> <i>sacB</i> <sup>+</sup>      | 7                     |
| pDN19lacΩ                              | Promoterless <i>lacZ</i> fusion vector, Sp <sup>r</sup> Sm <sup>r</sup> Tc <sup>r</sup>         | 8                     |
| pUCP18                                 | Broad host range shuttle vector, Ap <sup>r</sup>                                                | 9                     |
| pUCP20                                 | <i>Escherichia–Pseudomonas</i> shuttle vector; Ap <sup>r</sup>                                  | 10                    |
| pUCP20-P <sub>higB</sub> :: <i>gfp</i> | <i>higA</i> promoter of PA14 fused to promoterless <i>gfp</i> on pUCP20; Ap <sup>r</sup>        | 11                    |
| pBT                                    | Bait vector encoding phage cI protein, Chl <sup>r</sup>                                         | Stratagene            |
| pTRG                                   | Target vector encoding RNAP α-subunit protein, Tc <sup>r</sup>                                  | Stratagene            |
| pLLY1101                               | <i>srpA</i> gene driven by its native promoter in pUCP18, Ap <sup>r</sup>                       | This study            |
| pQE30                                  | Fusion vector for N-terminal His tag, Ap <sup>r</sup>                                           | Qiagen                |
| pYJJ1501                               | <i>his-srpA</i> fusion in pQE30 vector, Ap <sup>r</sup>                                         | This study            |
| pYJJ1605                               | <i>gp058</i> gene with promoter region cloned in pUCP20, Ap <sup>r</sup>                        | This study            |
| pYJJ1606                               | <i>gp104</i> gene promoter cloned in pDN19lacΩ, Sp <sup>r</sup> Sm <sup>r</sup> Tc <sup>r</sup> | This study            |
| pYJJ1607                               | <i>gp105</i> gene promoter cloned in pDN19lacΩ, Sp <sup>r</sup> Sm <sup>r</sup> Tc <sup>r</sup> | This study            |
| pYJJ1610                               | <i>gp058</i> gene promoter cloned in pDN19lacΩ, Sp <sup>r</sup> Sm <sup>r</sup> Tc <sup>r</sup> | This study            |
| pQY1302                                | <i>gp056</i> gene promoter cloned in pDN19lacΩ, Sp <sup>r</sup> Sm <sup>r</sup> Tc <sup>r</sup> | This study            |
| pQY1303                                | <i>gp071</i> gene promoter cloned in pDN19lacΩ, Sp <sup>r</sup> Sm <sup>r</sup> Tc <sup>r</sup> | This study            |
| pQY1304                                | <i>gp128</i> gene promoter cloned in pDN19lacΩ, Sp <sup>r</sup> Sm <sup>r</sup> Tc <sup>r</sup> | This study            |
| pYJJ1612                               | <i>gp058</i> gene cloned in pBT, Chl <sup>r</sup>                                               | This study            |
| pYJJ1613                               | <i>gp058</i> gene cloned in pTRG, Tc <sup>r</sup>                                               | This study            |
| pYJJ1614                               | <i>srpA</i> gene cloned in pBT, Chl <sup>r</sup>                                                | This study            |
| pYJJ1615                               | <i>srpA</i> gene cloned in pTRG, Tc <sup>r</sup>                                                | This study            |
| pYJJ1606                               | <i>gp104</i> gene cloned in pDN19lacΩ, Sp <sup>r</sup> Sm <sup>r</sup> Tc <sup>r</sup>          | This study            |
| pXJ1701                                | <i>gp058</i> gene driven by the P <sub>lac</sub> promoter in pUCP20, Ap <sup>r</sup>            | This study            |
| pHZW1701                               | 1.9 kb DNA fragment in pEx18Gm for knocking out the <i>srpA</i> gene,<br>Gm <sup>r</sup>        | This study            |
| pMD19 (Simple)                         | A linearized T-vector for cloning promoter fragments, Ap <sup>r</sup>                           | TaKaRa                |

---

|                 |                                                                       |            |
|-----------------|-----------------------------------------------------------------------|------------|
| pSL1701         | <i>gp058</i> gene promoter cloned in pMD19 (Simple), Ap <sup>r</sup>  | This study |
| pSL1702         | <i>gp104</i> gene promoter cloned in pMD19 (Simple), Ap <sup>r</sup>  | This study |
| pSL1703         | <i>gp105</i> gene promoter cloned in pMD19 (Simple), Ap <sup>r</sup>  | This study |
| pSL1704         | <i>PA1077</i> gene promoter cloned in pMD19 (Simple), Ap <sup>r</sup> | This study |
| pSL1705         | <i>PA1826</i> gene promoter cloned in pMD19 (Simple), Ap <sup>r</sup> | This study |
| pSL1706         | <i>PA3766</i> gene promoter cloned in pMD19 (Simple), Ap <sup>r</sup> | This study |
| pSL1707         | <i>gp053</i> gene promoter cloned in pMD19 (Simple), Ap <sup>r</sup>  | This study |
| pSL1708         | <i>gp125</i> gene promoter cloned in pMD19 (Simple), Ap <sup>r</sup>  | This study |
| <b>Phage</b>    |                                                                       |            |
| K5              | <i>Pseudomonas</i> phage                                              | 12         |
| <b>Nematode</b> |                                                                       |            |
| N2              | Wild type <i>Caenorhabditis elegans</i> strain (ancestral)            | 6          |

---

**Supplementary Table 3. Primers used in this study**

| Primers      | Sequence (5'-3')                    | Target genes                                                                             |
|--------------|-------------------------------------|------------------------------------------------------------------------------------------|
| OTn1         | GATCCTGGAAAACGGGAAAG                | Identification of Tn5G insertion sites with inverse PCR                                  |
| OTn2         | CCATCTCATCAGAGGGTAGT                |                                                                                          |
| 1-9-2F       | CGCAAGCTTCAGGGGTGTCAAGAAAGATAAACCGC | Cloning <i>srpA</i> into pUCP18                                                          |
| 1-9-2R       | CGCGGATCCGGTCATCTCCATCTTTTGCTGGGTCG |                                                                                          |
| 58-F         | GTTGGTTTCTTCCCCGAGG                 | qPCR primers, coding region of gene <i>gp058</i>                                         |
| 58-R         | ATTCGTCTGCCCTCCATCGC                |                                                                                          |
| S1           | AGCCTGCTCTCTCCGTTC                  | DNA probe synthesis for southern blot                                                    |
| S2           | TCTCAAGAGTGCTGTCCC                  |                                                                                          |
| DNAI-qF      | CTTCCGTAAGCATTGGC                   | qPCR primers, coding region of gene <i>gp104</i>                                         |
| DNAI-qR      | CAATGCCATACAGCGGTG                  |                                                                                          |
| DNAII-qF     | CTGACCAAACAGTGGGAAGC                | qPCR primers, coding region of gene <i>gp105</i>                                         |
| DNAII-qR     | TGAGCCGAACGGGTAGGA                  |                                                                                          |
| RNA-lacZ-F   | CGGAATTCATCCAGCAAACAACCTTA          | The promoter region of gene <i>gp058</i> for construction of transcriptional reporter    |
| RNA-lacZ-R   | CGGGATCCCGTGTACGTTGTCGGG            |                                                                                          |
| DNAI-lacZ-F  | CGGAATTCAGCGGAGACAACCTAAA           | The promoter region of gene <i>gp104</i> for construction of transcriptional reporter    |
| DNAI-lacZ-R  | CGGGATCCCATTTCCCTTTCCTCTGT          |                                                                                          |
| DNAII-lacZ-F | CGGAATTCCTTACTGCGCCAGCCCCTA         | The promoter region of gene <i>gp105</i> for construction of transcriptional reporter    |
| DNAII-lacZ-R | CGGGATCCCTCACACAGTTTTACATGGAC       |                                                                                          |
| pbp-lacZ-F   | CCGGAATTCACCTAGAACAGGTGCAGTATAAGC   | The promoter region of gene <i>gp071</i> for construction of transcriptional reporter    |
| pbp-lacZ-R   | CGCGGATCCGACAGAAAGGCGTCTAAAATCGTC   |                                                                                          |
| rnr-lacZ-F   | CCGGAATTCACTTTTCTACCTACGTCGTCACA    | The promoter region of gene <i>gp128</i> for construction of transcriptional reporter    |
| rnr-lacZ-R   | CGCGGATCCCTCTTAGTTGCTGGTTTGTAGT     |                                                                                          |
| cap-lacZ-F   | CCGGAATTCGCAAAGATCATCAGCGTCTTAG     | The promoter region of gene <i>gp105</i> for construction of transcriptional reporter    |
| cap-lacZ-R   | CGCGGATCCGTTTCGATCTCTTCGAACTGGACA   |                                                                                          |
| RNA-H-F1     | CGGGATCCGTGGAGGCTCTAGACGGA          | Cloning <i>gp058</i> into pTRG                                                           |
| RNA-H-F2     | TCCCCGGGGAGTGGAGGCTCTAGACGGA        | Cloning <i>gp058</i> into pBT                                                            |
| RNA-H-R      | CCCTCGAGTTATTGCCTCCGATGGATT         |                                                                                          |
| srpA-H-F1    | CGCGGATCCATGCCAAGACGATCTATCGACCA    | Cloning <i>srpA</i> into pTRG                                                            |
| srpA-H-F2    | CGGAATTCATGCCAAGACGATCTATCGACCA     | Cloning <i>srpA</i> into pBT                                                             |
| srpA-H-R     | CCCTCGAGTCACTGCCGCGCTGTCTGTG        |                                                                                          |
| RNA-P-F      | CTCATTCTCAAAGACCCG                  | Promoter fragments of the <i>gp058</i> gene for EMSA assay to determine the binding site |

|            |                                          |                                                                             |
|------------|------------------------------------------|-----------------------------------------------------------------------------|
| RNA-P-R    | CCTCTTAATCAAGGATGTG                      |                                                                             |
| BS-1-F     | TATTGCAATTTCTTTGGCCG                     |                                                                             |
| BS-2-F     | CCATATGCTGGCGGTAT                        |                                                                             |
| BS-4-F     | TTCTTTGGCCGTGCCATA                       |                                                                             |
| BS-5-F     | GCGGTATCTCCAAATCGG                       |                                                                             |
| BS-10-F    | GGTATCTCCAAATCGGATATGC                   |                                                                             |
| BS-21-F    | GTATCTCCAAATCGGATATGC                    |                                                                             |
| BS-20-R    | GTCATTAGCCAGCATATCC                      |                                                                             |
| BS-21-R    | GGGGTCTAGGTCATTAGCC                      |                                                                             |
| BS-23-R    | ATATCCGATTTGGAGATACCGC                   |                                                                             |
| BS-24-R    | CCAGCATATCCGATTTGGAG                     |                                                                             |
| BS-25-R    | TATCCGATTTGGAGATACC                      |                                                                             |
| BS-26-R    | ATCCGATTTGGAGATACCG                      |                                                                             |
| RNA-E-F    | <u>CGGGATCC</u> GACAAGGGGAATGAGAGAA      | The <i>gp058</i> gene with its own promoter for complement experiment       |
| RNA-E-R    | <u>CGGGATCC</u> ACTGGAGGGGTAGGTCTTC      |                                                                             |
| srpA-F     | <u>CGCGGATCC</u> ATGCCAAGACGATCTATCGACCA | Overexpression of <i>srpA</i> in pQE30                                      |
| srpA-R     | <u>CCCAAGCTT</u> TCACTGCCGCGCTGTCGTG     |                                                                             |
| DNAI-P-F   | AGCGGTATTGTAGGGTCTG                      | The promoter region of gene <i>gp104</i> for EMSA assay                     |
| DNAI-P-R   | CAGTCCGATTCCAGAGTCA                      |                                                                             |
| DNAII-P-F  | AACCTGATTAACGTGAAGC                      | The promoter region of gene <i>gp105</i> for EMSA assay                     |
| DNAII-P-R  | TCCTCCTGTAAACGACGA                       |                                                                             |
| PA1077-F   | CGAGTGAGCCGTGTCCCC                       | The promoter region of gene <i>PA1077</i> for EMSA assay                    |
| PA1077-R   | CGTCGCCAACACTTCAGCA                      |                                                                             |
| PA1826-F   | GAACTGGCGTAAGTCGGCC                      | The promoter region of gene <i>PA1826</i> for EMSA assay                    |
| PA1826-R   | GCCAGGCCGATGCC                           |                                                                             |
| PA3766-F   | CGCCTTTCTCTCCTTCAA                       | The promoter region of gene <i>PA3766</i> for EMSA assay                    |
| PA3766-R   | CGGCGACTACGACTTTAC                       |                                                                             |
| K5_gp053-F | AAGAGTCCGTTGGCGTAA                       | The promoter region of gene <i>gp053</i> for EMSA assay                     |
| K5_gp053-R | TCGCTTGTAGTATTTCGTAGAC                   |                                                                             |
| K5_gp125-F | CAACCACGAAGGCTAATC                       | The promoter region of gene <i>gp125</i> for EMSA assay                     |
| K5_gp125-R | GCCACAACGCTTTGAACA                       |                                                                             |
| M13-47-cy3 | CGCCAGGGTTTTCCAGTCAAGAC                  | Amplification of the promoter regions cloned in the T-vector pMD19 (simple) |
| RV-M-cy3   | GAGCGGATAACAATTTACACAGG                  |                                                                             |
| HZW-P1     | <u>CGGAATTCC</u> GCCGCCGCGAAATTTTC       | The upstream fragment for knocking out the <i>srpA</i> gene                 |
| HZW-P2     | <u>CGGGATCC</u> GATCGAGATAGCCCATCATT     |                                                                             |
| HZW-P3     | <u>CGGGATCC</u> GGTCCGTAGCTACGTGGG       | The downstream fragment for knocking out the <i>srpA</i> gene               |

|        |                                         |                                                                                         |
|--------|-----------------------------------------|-----------------------------------------------------------------------------------------|
| HZW-P4 | GGGGT <u>ACCGCCG</u> ACCACTACGCTCCT     |                                                                                         |
| RNA-F  | CCGA <u>AAGCTT</u> GGTCCTCAAGACCTTAGCAT | The <i>gp058</i> gene driven by the P <sub>lac</sub> promoter for complement experiment |
| RNA-R  | CGCA <u>AAGCTT</u> CATGAATCTATCGGCACTCC |                                                                                         |

- a: The underlined sequences stand for the recognition sites of the restriction enzymes.
- b: The primers RNA-H-F1 and RNA-H-R are used for amplification of *gp058* into pTRG. The primers RNA-H-F2 and RNA-H-R are used for amplification of *gp058* into pBT.
- c: The primers srpA-H-F1 and srpA-H-R are used for amplification of *srpA* into pTRG. The primers srpA-H-F2 and srpA-H-R are used for amplification of *srpA* into pBT.
- d: The primers M13-47-cy3 and RV-M-cy3 are both labeled with the fluorescent dye cy3 at 5' ends. The amplicons are used as probes in the EMSA assay.

## Supplementary References

1. Bradley TJ, Khan NH. The production of extracellular lipids by *Pseudomonas Aeruginosa* NCTC 2000 in stationary liquid media containing macrogols. *The Journal of pharmacy and pharmacology* **26**, 900-902 (1974).
2. Wang J, Mushegian A, Lory S, Jin S. Large-scale isolation of candidate virulence genes of *Pseudomonas aeruginosa* by in vivo selection. *Proceedings of the National Academy of Sciences of the United States of America* **93**, 10434-10439 (1996).
3. Cui X, *et al.* Characterization of *Pseudomonas aeruginosa* Phage C11 and Identification of Host Genes Required for Virion Maturation. *Scientific reports* **6**, 39130 (2016).
4. Masuda N, Ohya S. Cross-resistance to meropenem, cephems, and quinolones in *Pseudomonas aeruginosa*. *Antimicrobial agents and chemotherapy* **36**, 1847-1851 (1992).
5. Liberati NT, *et al.* An ordered, nonredundant library of *Pseudomonas aeruginosa* strain PA14 transposon insertion mutants. *Proceedings of the National Academy of Sciences of the United States of America* **103**, 2833-2838 (2006).
6. Brenner S. The genetics of *Caenorhabditis elegans*. *Genetics* **77**, 71-94 (1974).
7. Hoang TT, Karkhoff-Schweizer RR, Kutchma AJ, Schweizer HP. A broad-host-range Flp-FRT recombination system for site-specific excision of chromosomally-located DNA sequences: application for isolation of unmarked *Pseudomonas aeruginosa* mutants. *Gene* **212**, 77-86 (1998).
8. Totten PA, Lory S. Characterization of the type a flagellin gene from *Pseudomonas aeruginosa* PAK. *J Bacteriol* **172**, 7188-7199 (1990).
9. Schweizer HP. *Escherichia-Pseudomonas* shuttle vectors derived from pUC18/19. *Gene* **97**, 109-121 (1991).
10. West SE, Schweizer HP, Dall C, Sample AK, Runyen-Janecky LJ. Construction of improved *Escherichia-Pseudomonas* shuttle vectors derived from pUC18/19 and sequence of the region required for their replication in *Pseudomonas aeruginosa*. *Gene* **148**, 81-86 (1994).
11. Li M, *et al.* HigB of *Pseudomonas aeruginosa* Enhances Killing of Phagocytes by Up-Regulating the Type III Secretion System in Ciprofloxacin Induced Persister Cells. *Frontiers in cellular and infection microbiology* **6**, 125 (2016).
12. Li L, Pan X, Cui X, Sun Q, Yang X, Yang H. Characterization of *Pseudomonas aeruginosa* phage K5 genome and identification of its receptor related genes. *Journal of basic microbiology* **56**, 1344-1353 (2016).
